# Supplementary material for: Effect of Background Water Matrices on Pharmaceutical and Personal Care Product Removal by UV-LED/TiO2
Source: MDPI journal article supplement (doi:10.3390/catal11050576), 2021-04-30
Supplement: s1 [file s1]

# **Effect of background water matrices on pharmaceutical and personal care products removal by UV-LED/TiO<sub>2</sub>**

Azar Fattahi<sup>1,2\*</sup>, Ivana Jaciw-Zurakowsky<sup>1</sup>, Nivetha Srikanthan<sup>2</sup>, Leslie M. Bragg<sup>2</sup>, Robert  
Liang<sup>1,2,3</sup>, Norman Zhou<sup>1</sup>, Mark R. Servos<sup>2</sup>, Maricor J. Arlos<sup>4\*</sup>

<sup>1</sup>Centre for Advanced Materials Joining, Department of Mechanical and Mechatronics  
Engineering, University of Waterloo, Waterloo, Ontario, Canada, N2L3G1

<sup>2</sup>Department of Biology, University of Waterloo, Waterloo, ON, Canada, N2L3G1

<sup>3</sup>Waterloo Institute of Nanotechnology, University of Waterloo, Waterloo, Ontario, N2L3G1

<sup>4</sup>Civil and Environmental Engineering, University of Alberta, Edmonton, Alberta, Canada,  
T6G1H9

## **Table of Contents**

| Title                                                                                | Page (s) |
|--------------------------------------------------------------------------------------|----------|
| <b>Data analysis</b>                                                                 | 2        |
| <b>Literature studies (80 papers)</b>                                                | 3-7      |
| <b>Pharmaceutical's abbreviations</b>                                                | 8-9      |
| <b>Anova studies</b>                                                                 | 12-14    |
| <b>PCA analysis</b>                                                                  | 15-16    |
| <b>Concentration, Chemical and<br/>physical properties of the<br/>targeted PPCPs</b> | 20-22    |
| <b>References</b>                                                                    | 23-31    |

## Data analysis

Equation S1: Removal% during dark period

$$\text{Removal \%} = \frac{C_0 - C_f}{C_0} \times 100 \quad (1)$$

$C_0$  is the initial concentration (Table S1) and  $C_{60}$  in the concentrations at  $t=60$  min.

Equation S2: Langmuir-Hinshelwood kinetics model

$$\ln \frac{C_t}{C_0} = -k_{app} t \quad (2)$$

$C_0$  and  $C_t$  are the concentrations at  $t=0$  min and throughout the exposure period, respectively and  $k_{app}$  is the apparent first order reaction rate constant ( $\text{min}^{-1}$ )

Equation S3: EEO

$$EEO = \frac{1000 Pt}{V \log\left(\frac{C_i}{C_f}\right)} \quad (4)$$

$P$  is the rated power (kW),  $V$  is the volume of treated water (L) in the time  $t$  (h), and  $c_i$  and  $c_f$  are the initials and final concentrations, respectively.

**Table S1.** Studies in photocatalytic degradation of pharmaceuticals and personal care compounds in different water matrices

| No. | Water Matrix    | PPCP                                                                                                  | Photocatalyst                                                                | light condition                                                               | Ref. |
|-----|-----------------|-------------------------------------------------------------------------------------------------------|------------------------------------------------------------------------------|-------------------------------------------------------------------------------|------|
| 1   | Ultrapure water | DCF, CBZ, SMX                                                                                         | Activated Carbon doped with TiO <sub>2</sub>                                 | Xenon lamp (300 W)                                                            | [1]  |
| 2   |                 | DCF                                                                                                   | TiO <sub>2</sub>                                                             | UV-C, solar irradiation                                                       | [2]  |
| 3   |                 | MER                                                                                                   | TiO <sub>2</sub> immobilized on fiber glass                                  | UV lamps (8 W)                                                                | [3]  |
| 4   |                 | ANT                                                                                                   | TiO <sub>2</sub> - Reduced graphene oxide                                    | UV-A (38 W m <sup>-2</sup> ), Visible irradiation (307.38 W m <sup>-2</sup> ) | [4]  |
| 5   |                 | ACE, IBU, ANT                                                                                         | Activated Carbon doped with TiO <sub>2</sub>                                 | Xenon lamp (765 W m <sup>-2</sup> )                                           | [5]  |
| 6   |                 | TC                                                                                                    | TiO <sub>2</sub>                                                             | UV-B lamp (7 W)                                                               | [6]  |
| 7   |                 | ATEN, ATOR, o-ATOR, p-ATOR, ATRZ, CBZ, eCBZ, DCF, FLX, NFLX, GFZ, IBU, NPX, SULF, TCS, TCB, TRIM, VEN | porous titanium – titanium dioxide (PTT) substrates                          | Controlled periodic illumination UV-LED (1.7×10 <sup>-3</sup> W)              | [7]  |
| 8   |                 | DCF                                                                                                   | Sulfur doped TiO <sub>2</sub>                                                | Visible light                                                                 | [8]  |
| 9   |                 | 4-CP, NPX                                                                                             | Nickel, iron and copper doped with TiO <sub>2</sub>                          | UV lamps (15 W)                                                               | [9]  |
| 10  |                 | IBP, CTZ, NPX                                                                                         | TiO <sub>2</sub> immobilized on polyacrylonitrile/multiwall carbon nanotubes | Visible light (125 W), Xenon lamp                                             | [10] |
| 11  |                 | CBZ                                                                                                   | TiO <sub>2</sub> / Ti <sub>3</sub> C <sub>2</sub> T <sub>x</sub>             | UV light, Solar light                                                         | [11] |
| 12  |                 | ACE                                                                                                   | TiO <sub>2</sub> - Tungsten trioxide                                         | Xenon lamp (500 W)                                                            | [12] |
| 13  |                 | β blocker                                                                                             | Platinum doped with TiO <sub>2</sub> - Reduced graphene oxide-               | Xenon lamp (300 W)                                                            | [13] |
| 14  |                 | Phenol                                                                                                | Epoxy TiO <sub>2</sub> sand composite                                        | UV-A lamps (15 W)                                                             | [14] |
| 15  |                 | ACE                                                                                                   | TiO <sub>2</sub> - pristine carbon nanotubes                                 | High-pressure mercury lamp (7.53 mW m <sup>-2</sup> )                         | [15] |
| 16  |                 | BPA                                                                                                   | Nickel doped with TiO <sub>2</sub>                                           | Visible light (25 W)                                                          | [16] |
| 17  |                 | 4-CP                                                                                                  | Nitrogen doped with TiO <sub>2</sub>                                         | Visible LED (100 W)                                                           | [17] |

|    |                                                                                                 |                                                                                   |                                                                              |      |
|----|-------------------------------------------------------------------------------------------------|-----------------------------------------------------------------------------------|------------------------------------------------------------------------------|------|
| 18 | CBZ, SMZ, IBP                                                                                   | TiO <sub>2</sub> - Reduced graphene oxide immobilized on optical fiber            | High-pressure UV Mercury vapor lamp (160 W)                                  | [18] |
| 19 | DCP, BPA, IBU, FLU                                                                              | Boron doped with TiO <sub>2</sub>                                                 | Visible light irradiation (150 W)                                            | [19] |
| 20 | ATEN, ATOR, ATZ, CBZ, DCF, FLX, GEM, IBU, MON, NPX, SULF, TCS, TCB, TRIM, VEN                   | TiO <sub>2</sub>                                                                  | UV-LED ( $1.7 \times 10^{-3}$ W)                                             | [20] |
| 21 | CBZ, SMZ, IBP                                                                                   | TiO <sub>2</sub> - Reduced graphene oxide, Iron doped TiO <sub>2</sub>            | Visible light source (150W)                                                  | [21] |
| 22 | ATEN, ATOR, o-ATOR, p-ATOR, ATRZ, CBZ, DCF, FLX, NFLX, GFZ, IBU, NPX, SULF, TCS, TCB, TRIM, VEN | TiO <sub>2</sub> immobilized onto quartz fiber filters and porous titanium sheets | UV-LED ( $1.7 \times 10^{-3}$ W)                                             | [22] |
| 23 | DMX                                                                                             | Silver doped TiO <sub>2</sub>                                                     | UV-C (20 W)                                                                  | [23] |
| 24 | IBU                                                                                             | Bismuth and nickel doped with TiO <sub>2</sub>                                    | UV (36 W)                                                                    | [24] |
| 25 | MBC, DMI                                                                                        | Iron doped with TiO <sub>2</sub>                                                  | Solar light (600 W m <sup>-2</sup> ), UV light (30 W m <sup>-2</sup> )       | [25] |
| 26 | ACT, DCF, IBP, SMX,                                                                             | TiO <sub>2</sub>                                                                  | UV-C, UV-B, UV-A (10 mW)                                                     | [26] |
| 27 | ACV                                                                                             | TiO <sub>2</sub> - graphitic carbon nitride                                       | Visible light (30 mW m <sup>-2</sup> )                                       | [27] |
| 28 | EZ                                                                                              | Platinum doped TiO <sub>2</sub> film                                              | UV (10 W)                                                                    | [28] |
| 29 | DCF, ACE, AMX, AMP                                                                              | Activated carbon doped TiO <sub>2</sub>                                           | Solar UV (30 W m <sup>-2</sup> )                                             | [29] |
| 30 | CIP                                                                                             | TiO <sub>2</sub>                                                                  | UV-C                                                                         | [30] |
| 31 | BPA, CBZ                                                                                        | Multiwall carbon nanotubes- TiO <sub>2</sub> - SiO <sub>2</sub>                   | UV light (1 mW m <sup>-2</sup> )                                             | [31] |
| 32 | SP                                                                                              | Nitrogen doped TiO <sub>2</sub>                                                   | UV-LED light (32 mW m <sup>-2</sup> )                                        | [32] |
| 33 | IFO, CP, TRO                                                                                    | TiO <sub>2</sub>                                                                  | UV-A (8 W)                                                                   | [33] |
| 34 | IBP, CBZ, ATEN                                                                                  | Immobilized TiO <sub>2</sub> with calcium alginate beads                          | UV-A light (38 mW m <sup>-2</sup> ), Visible light (307 mW m <sup>-2</sup> ) | [34] |
| 35 | ACP                                                                                             | Nitrogen doped TiO <sub>2</sub>                                                   | Visible light                                                                | [35] |
| 36 | TCA                                                                                             | carbon doped TiO <sub>2</sub>                                                     | Visible light                                                                | [36] |

|    |               |                                                                                 |                                                        |                                                                  |      |
|----|---------------|---------------------------------------------------------------------------------|--------------------------------------------------------|------------------------------------------------------------------|------|
| 37 |               | NB, MTZ                                                                         | Silver doped hollow TiO <sub>2</sub>                   | High pressure mercury lamp (125 W)                               | [37] |
| 38 |               | 4-NP                                                                            | Iron doped with TiO <sub>2</sub>                       | Visible light (150 W)                                            | [38] |
| 39 |               | MMA                                                                             | Nitrogen doped TiO <sub>2</sub>                        | Natural sun light, UV light                                      | [39] |
| 40 |               | AMX, 2,4-DCP                                                                    | Silver doped TiO <sub>2</sub>                          | Visible light (180 W m <sup>-2</sup> )                           | [40] |
| 41 |               | OFX                                                                             | Nickel doped TiO <sub>2</sub>                          | Solar light                                                      | [41] |
| 42 |               | CHD                                                                             | TiO <sub>2</sub>                                       | UV-A (10 W)                                                      | [42] |
| 43 |               | ACE, SMZ, CMT, PRO                                                              | TiO <sub>2</sub> nanofibers                            | UV-A (10 W)                                                      | [43] |
| 44 |               | LEVO                                                                            | TiO <sub>2</sub>                                       | UV-C                                                             | [44] |
| 45 |               | CAP                                                                             | Silver doped TiO <sub>2</sub>                          | UV (30W)                                                         | [45] |
| 46 |               | AMX                                                                             | Lead doped TiO <sub>2</sub>                            | UV-C (15 W)                                                      | [46] |
| 47 |               | 2,4-DCP                                                                         | Chromium doped TiO <sub>2</sub>                        | Visible light halogen lamp (1000 W)                              | [47] |
| 48 |               | VEN, FLX, SMZ                                                                   | TiO <sub>2</sub> nano wire                             | Pressure mercury lamp (2.7 ×10 <sup>-4</sup> W m <sup>-2</sup> ) | [48] |
| 49 |               | NFLX, ATOR, TRIM, ATRZ, LIN, FLX, VEN, SMZ, DCF, TRIM, BPA, GEM, ATRZ, CBZ, IBU | TiO <sub>2</sub> nano wire                             | Pressure mercury lamp (2.7 ×10 <sup>-4</sup> W m <sup>-2</sup> ) | [49] |
| 50 |               | IBP, ATEN, CBZ                                                                  | Alginate supported TiO <sub>2</sub>                    | UV light (80 ×10 <sup>-6</sup> W m <sup>-2</sup> )               | [34] |
| 51 |               | INH, Sulfa, Trim, NFIX, Lin, MXF, MTZ                                           | TiO <sub>2</sub> - Biobased polyethylene terephthalate | Xenon lamp (1.5 kW)                                              | [44] |
| 52 |               | BPA                                                                             | Zirconium doped TiO <sub>2</sub>                       | UV light (20 W)                                                  | [50] |
| 53 |               | SCP, SPR, SMZ                                                                   | TiO <sub>2</sub>                                       | High-pressure mercury lamp (125 W)                               | [51] |
| 54 | Surface water | DCF, MEM                                                                        | TiO <sub>2</sub> -SnS <sub>2</sub> nanocomposite       | Xenon arc lamp (450 W)                                           | [52] |
| 55 |               | CIP, OFX                                                                        | TiO <sub>2</sub>                                       | Solar light (1366 W m <sup>-2</sup> )                            | [53] |
| 56 |               | SMZ                                                                             | TiO <sub>2</sub>                                       | UV-C (0.5 mW m <sup>-2</sup> )                                   | [54] |
| 57 |               | CBZ, SMZ                                                                        | Magnetic carbon nanotube-TiO <sub>2</sub> Composites   | Solar simulator (1000 W m <sup>-2</sup> )                        | [55] |

|    |                            |                                                                                                                               |                                                                       |                                                 |      |
|----|----------------------------|-------------------------------------------------------------------------------------------------------------------------------|-----------------------------------------------------------------------|-------------------------------------------------|------|
| 58 |                            | CBZ, GEM, TRIM, WAR, MET                                                                                                      | TiO <sub>2</sub> film deposited on a stainless-steel mesh             | Mercury low pressure UV lamp (40 W)             | [56] |
| 59 |                            | BPA                                                                                                                           | Nitrogen, fluorine co-doped TiO <sub>2</sub>                          | Simulated sunlight xenon lamp (1600 W)          | [57] |
| 60 |                            | CBZ                                                                                                                           | Nitrogen doped TiO <sub>2</sub>                                       | Solar simulator xenon arc lamp (150 W)          | [58] |
| 61 |                            | ACE, ATEN, ATOR, o-ATOR, p-ATOR, ATRZ, CAFF, CBZ, eCBZ, DESVEN, DCF, FLX, NFLX, GEM, IBU, NPX, MON, SMZ, SULF, TCS, TRIM, VEN | Silver doped TiO <sub>2</sub>                                         | UV-LED (2060 and 2300 mW)                       | [59] |
| 62 | <b>Wastewater effluent</b> | GEM, NPX, HCT                                                                                                                 | TiO <sub>2</sub>                                                      | UV-A (10 W)                                     | [60] |
| 63 |                            | CBZ, DCF, TRIM                                                                                                                | Nitrogen doped TiO <sub>2</sub> , Iron doped TiO <sub>2</sub>         | Direct sunlight (29.7 ± 5.3 W m <sup>-2</sup> ) | [61] |
| 64 |                            | ACT, FRS, NMD, DZP                                                                                                            | TiO <sub>2</sub>                                                      | UV-A, UV-C (6 W)                                | [62] |
| 65 |                            | CBZ, DCF, IOP, GEM, MET, SMZ, TRIM, WAR                                                                                       | Immobilized TiO <sub>2</sub> on PVDF dual layer hollow fiber membrane | UV lamps (40 W)                                 | [63] |
| 66 |                            | IBU                                                                                                                           | TiO <sub>2</sub>                                                      | UV high intensity LEDs (10 W)                   | [64] |
| 67 |                            | DCF, CAFF, IFO, FP, RXM, AZM                                                                                                  | TiO <sub>2</sub>                                                      | Sunlight exposure                               | [65] |
| 68 |                            | MTZ                                                                                                                           | Iron doped TiO <sub>2</sub>                                           | UV-C (125 W)                                    | [66] |
| 69 |                            | TCS                                                                                                                           | Carbon nanotube doped TiO <sub>2</sub>                                | UV-C (6 W)                                      | [67] |
| 70 |                            | ACE, ANT, CAFF, KET, MET, SMZ, CBZ, HCT, DCF                                                                                  | TiO <sub>2</sub>                                                      | Solar irradiation                               | [68] |
| 71 |                            | DCF, CBZ, IBU, PRO                                                                                                            | TiO <sub>2</sub> immobilized on quartz sand                           | simulate solar light, Xenon high (55 W)         | [69] |
| 72 |                            | CMT, PRO, CBZ                                                                                                                 | Immobilized electrospun TiO <sub>2</sub> nanofiber                    | UV (4 W)                                        | [70] |
| 73 |                            | ATEN, HCT, OFX, TRIM                                                                                                          | TiO <sub>2</sub>                                                      | UV (30 W m <sup>-2</sup> )                      | [71] |
| 74 |                            | MTN, CLT, BFN, CBZ, DCF, SMX                                                                                                  | TiO <sub>2</sub>                                                      | Xenon lamp (1500 W)                             | [72] |

|    |                                                                                                                                                   |                                      |                                                     |      |
|----|---------------------------------------------------------------------------------------------------------------------------------------------------|--------------------------------------|-----------------------------------------------------|------|
| 75 | FLX, DCF, CBZ, BPA, OFX, NFLX, GEM, PAR, CLOT, AZM, LOR, PRO, FRS, HCT, FN, Losartan, KETO, CR, FCZ, CPFX, Xanax, TRF, TCA, HHCB, MK, AHTN        | TiO <sub>2</sub>                     | UV light                                            | [73] |
| 76 | BPA                                                                                                                                               | TiO <sub>2</sub>                     | UV-A (0.7 W)                                        | [74] |
| 77 | USAN, ATEN, ATRZ, AZM, BZF, CAFF, CBZ, CPFX, IBU, INDO, IPU, KETO, LIN, NPX, NIC, NFLX, OFX, PX, PRAV, PRMB, PRO, PP, R, SBL, SIM, SMZ, TRIM, VEN | TiO <sub>2</sub>                     | Solar simulator xenon lamp (765 W m <sup>-2</sup> ) | [75] |
| 78 | OFX, ACE, DCF, CAF, CBZ, TRIM, TBZ, ACP                                                                                                           | TiO <sub>2</sub>                     | UV, xenon lamp (300 W)                              | [76] |
| 79 | CBZ                                                                                                                                               | Membrane bioreactor TiO <sub>2</sub> | UV-A (8 W)                                          | [77] |
| 80 | ATEN, PRO                                                                                                                                         | TiO <sub>2</sub>                     | Solar simulator xenon lamp (1000 W)                 | [78] |

**Table S2.** Pharmaceuticals and personal care products (PPCP) and their abbreviations

| PPCP                                   | Abb.    | PPCP                        | Abb.  |
|----------------------------------------|---------|-----------------------------|-------|
| <b>Acephate</b>                        | APT     | <b>Isoniazid</b>            | INH   |
| <b>Acetaminophen</b>                   | ACE     | <b>Isoproturon</b>          | IPU   |
| <b>Acetamiprid</b>                     | ACP     | <b>Iopromide</b>            | IOP   |
| <b>Acyclovir</b>                       | ACV     | <b>Ketoprofen</b>           | KeTO  |
| <b>Alprazolam</b>                      | Xanax   | <b>Ketorolac</b>            | KET   |
| <b>Amoxicillin</b>                     | AMX     | <b>Levofloxacin</b>         | LEVO  |
| <b>Ampicillin</b>                      | AMP     | <b>Lincomycin</b>           | LIN   |
| <b>Antipyrine</b>                      | ANT     | <b>Lorazepam</b>            | LOR   |
| <b>Atenolol</b>                        | ATEN    | <b>Malathion</b>            | MMA   |
| <b>Atorvastatin</b>                    | ATOR    | <b>Memantine</b>            | MEM   |
| <b>o-Hydroxy atorvastatin</b>          | o-ATOR  | <b>Meropenem</b>            | MER   |
| <b>p-Hydroxy atorvastatin</b>          | p-ATOR  | <b>mesotrione</b>           | MTN   |
| <b>Atrazine</b>                        | ARTZ    | <b>Metoprolol</b>           | MET   |
| <b>Azithromycin</b>                    | AZM     | <b>Metronidazole</b>        | MTZ   |
| <b>bifenthrin</b>                      | BFN     | <b>Monensin</b>             | MON   |
| <b>Benzafibrate</b>                    | BZF     | <b>Moxifloxacin</b>         | MXF   |
| <b>Bisphenol A</b>                     | BPA     | <b>Musk ketone</b>          | MK    |
| <b>Caffeine</b>                        | CAFF    | <b>4-nitrophenol</b>        | 4-NP  |
| <b>Carbamazepine</b>                   | CBZ     | <b>Naproxen</b>             | NPX   |
| <b>Carvedilol</b>                      | CR      | <b>Nicotine</b>             | NIC   |
| <b>10,11-Epoxyde<br/>Carbamazepine</b> | eCBZ    | <b>Nimesulide</b>           | NMD   |
| <b>Cetirizine</b>                      | CTZ     | <b>Nitrobenzene</b>         | NB    |
| <b>Chloramphenicol</b>                 | CAP     | <b>Nimesulide</b>           | NMD   |
| <b>4-chlorophenol</b>                  | 4-CP    | <b>Norfluoxetine</b>        | NFLX  |
| <b>Chlorhexidine<br/>Digluconate</b>   | CHD     | <b>Ofloxacin</b>            | OFX   |
| <b>Cimetidine</b>                      | CMT     | <b>Pravastatin</b>          | PRAV  |
| <b>Ciprofloxacin</b>                   | CIP     | <b>Paraxanthine</b>         | PX    |
| <b>Clothianidin</b>                    | CLT     | <b>Paroxetine</b>           | PAR   |
| <b>Clotrimazole</b>                    | CLOT    | <b>Primidone</b>            | PRMB  |
| <b>Cyclophosphamide</b>                | CP      | <b>Propyphen.</b>           | PP    |
| <b>Desvenlafaxine</b>                  | DESVEN  | <b>Propranolol</b>          | PRO   |
| <b>Dexamethasone</b>                   | DXM     | <b>Spiramycin</b>           | SP    |
| <b>Diazepam</b>                        | DZP     | <b>Sulfachlorpyridazine</b> | SCP   |
| <b>Diclofenac</b>                      | DCF     | <b>Sulfamethazine</b>       | SMZ   |
| <b>2,4-dichlorophenol</b>              | 2,4-DCP | <b>Sulfamethoxazole</b>     | SULFA |
| <b>Ethenzamide</b>                     | EZ      | <b>Sulfapyridine</b>        | SPR   |



|                            |      |                               |      |
|----------------------------|------|-------------------------------|------|
| <b>Fenofibrate</b>         | FN   | <b>Ranitidine</b>             | R    |
| <b>Fenoprofen</b>          | FP   | <b>Roxithromycin</b>          | RXM  |
| <b>Flurbiprofen</b>        | FLU  | <b>Salbutamol</b>             | SBL  |
| <b>Fluconazole</b>         | FCZ  | <b>Simazine</b>               | SIM  |
| <b>Fluoroquinolone</b>     | FQ   | <b>Tetracycline</b>           | TC   |
| <b>Fluoxetine</b>          | FLX  | <b>Terbinafine</b>            | TRF  |
| <b>Furosemide</b>          | FRS  | <b>thiabendazole</b>          | TBZ  |
| <b>Galaxolide</b>          | HHCB | <b>Tonalide</b>               | AHTN |
| <b>Gemfibrozil</b>         | GEM  | <b>2,4,6-Trichloroanisole</b> | TCA  |
| <b>Hydrochlorothiazide</b> | HCT  | <b>Triclosan</b>              | TCS  |
| <b>Ibuprofen</b>           | IBU  | <b>Trimethoprim</b>           | TRIM |
| <b>Ifosfamide</b>          | IFO  | <b>Trofosfamide</b>           | TRO  |
| <b>Indomethacine</b>       | INDO | <b>Venlafaxine</b>            | VEN  |
|                            |      | <b>Warfarin</b>               | WAR  |

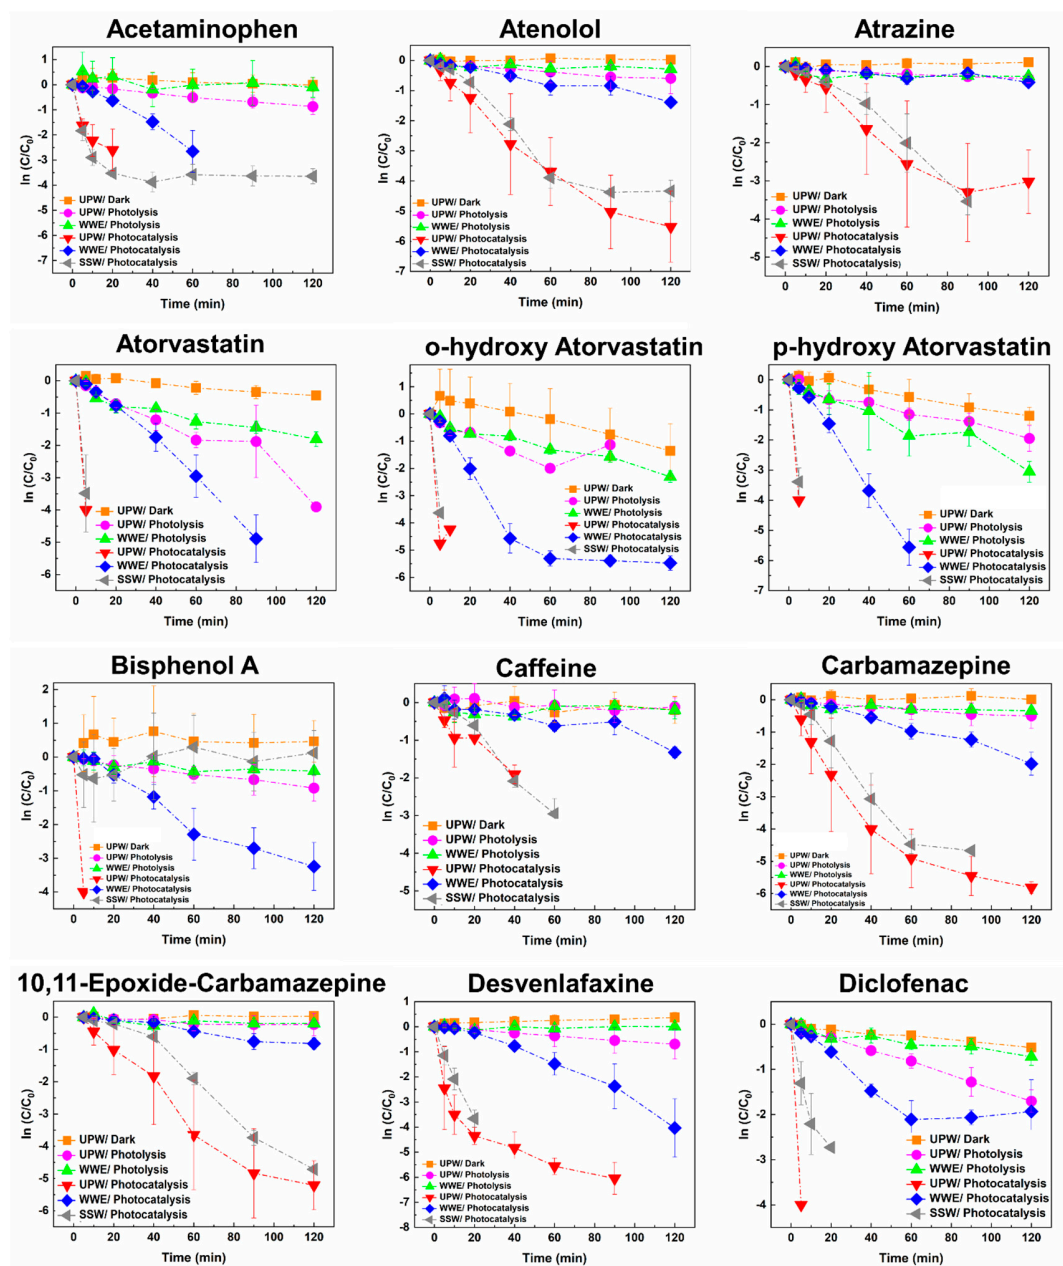

**Fig. S1 (continued)** Removal of targeted PPCPs in ultrapure water (UPW), wastewater effluent (WWE), and synthetic surface water (SSW) under dark (120 min dark irradiation using P25), photolysis (120 min under UV-LED irradiation without P25) and photocatalysis (120 min under UV-LED irradiation and using P25) treatments.

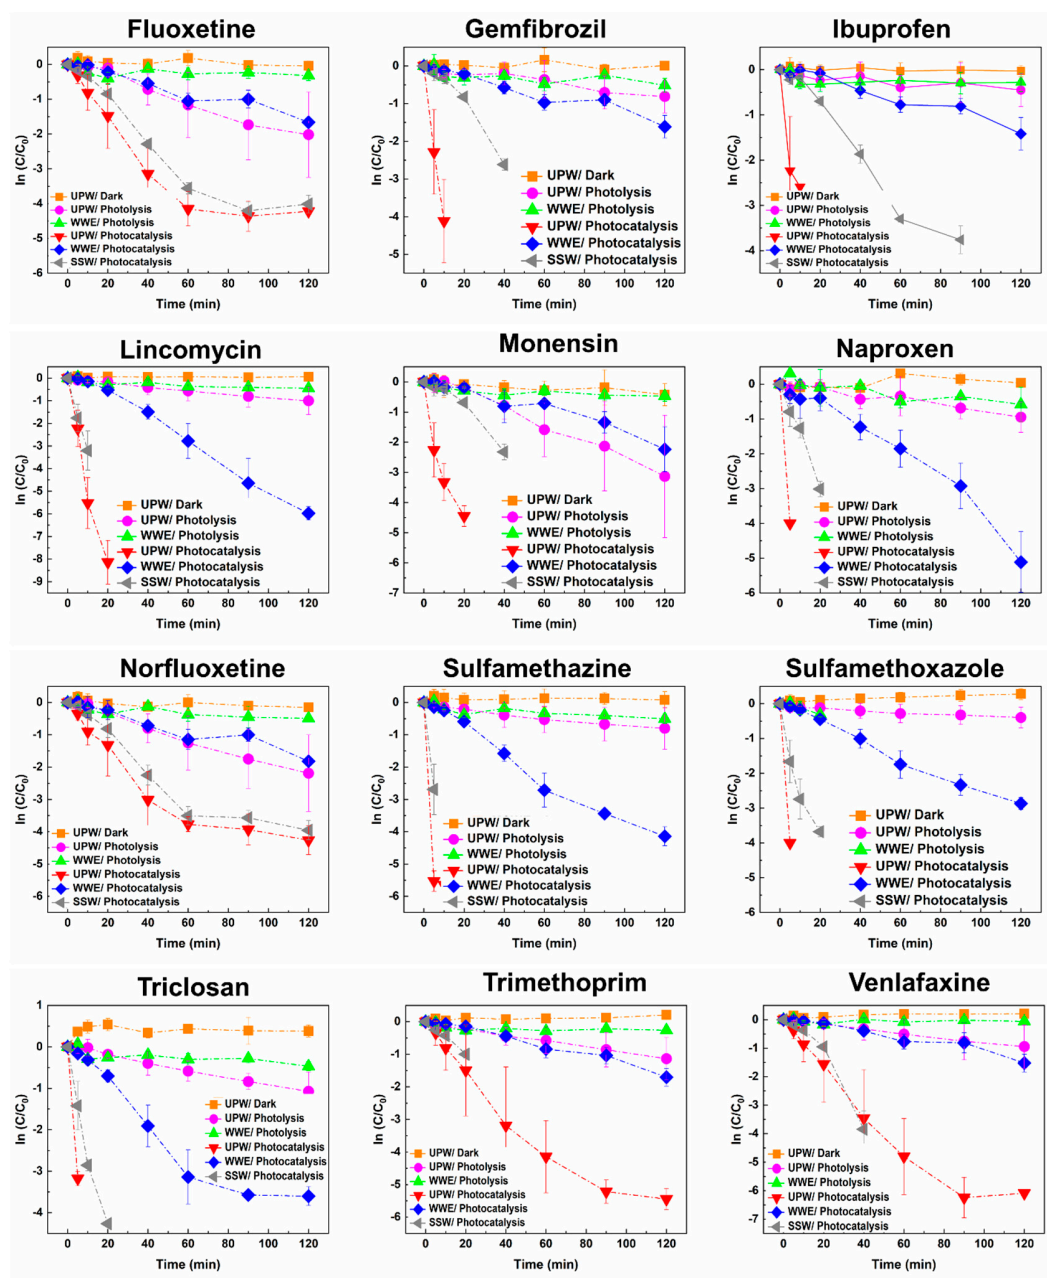

**Fig. S1 (continued)** Removal of targeted PPCPs in ultrapure water (UPW), wastewater effluent (WWE), and synthetic surface water (SSW) under dark (120 min dark irradiation using P25), photolysis (120 min under UV-LED irradiation without P25) and photocatalysis (120 min under UV-LED irradiation and using P25) treatments.

**Table S3.** *p*-values for One-Way ANOVA tests (SigmaPlot,  $\alpha=0.05$ ) during 60 min equilibrium period, photolysis and photocatalysis. Tukey tests (multiple comparisons) were conducted when a statistical significance was detected with overall statistical significance level of 0.05.

|                           | Equilibrium Period |             |             | Photolysis  | Photocatalysis |             |             |
|---------------------------|--------------------|-------------|-------------|-------------|----------------|-------------|-------------|
| Compound                  | UPW vs. SSW        | UPW vs. WWE | SSW vs. WWE | UPW vs. WWE | MQW vs. SSW    | MQW vs. WWE | SSW vs. WWE |
| Acetaminophen             | No                 | No          | No          | No          | No             | Yes         | Yes         |
| <i>p</i> -value           | 0.223              | 0.223       | 0.223       | 0.124       | 0.206          | 0.002       | <0.001      |
| Atenolol                  | No                 | No          | No          | No          | No             | Yes         | No          |
| <i>p</i> -value           | 0.450              | 0.450       | 0.450       | 0.432       | 0.631          | 0.022       | 0.056       |
| Atorvastatin              | No                 | No          | No          | Yes         | No             | Yes         | Yes         |
| <i>p</i> -value           | 0.283              | 0.283       | 0.283       | 0.002       | 0.0305         | 0.003       | 0.012       |
| o-Hydroxy<br>Atorvastatin | Yes                | Yes         | No          | Yes         | No             | Yes         | Yes         |
| <i>p</i> -value           | 0.02               | 0.002       | 0.176       | 0.167       | 0.593          | 0.013       | 0.003       |
| p-Hydroxy<br>Atorvastatin | No                 | Yes         | No          | Yes         | No             | Yes         | Yes         |
| <i>p</i> -value           | 0.056              | 0.018       | 0.056       | 0.005       | 0.560          | 0.007       | 0.017       |
| Atrazine                  | No                 | No          | No          | No          | No             | Yes         | No          |
| <i>p</i> -value           | 0.790              | 0.790       | 0.790       | 0.290       | 0.823          | 0.037       | 0.062       |
| Bisphenol A               | Yes                | Yes         | No          | No          | Yes            | Yes         | Yes         |
| <i>p</i> -value           | 0.004              | 0.003       | 0.995       | 1           | <0.001         | <0.001      | 0.022       |
| Caffeine                  | No                 | No          | No          | Yes         | No             | No          | No          |
| <i>p</i> -value           | 0.486              | 0.486       | 0.486       | 0.048       | 0.145          | 0.145       | 0.145       |

|                                |       |       |       |       |        |        |        |
|--------------------------------|-------|-------|-------|-------|--------|--------|--------|
| Carbamazepine                  | No    | No    | No    | No    | No     | No     | No     |
| <i>p-value</i>                 | 0.436 | 0.436 | 0.436 | 0.783 | 0.069  | 0.069  | 0.069  |
| 10,11-Epoxyde<br>Carbamazepine | No    | No    | No    | No    | No     | Yes    | No     |
| <i>p-value</i>                 | 0.927 | 0.927 | 0.927 | 0.602 | 0.165  | 0.014  | 0.150  |
| Desvenlafaxine                 | No    | No    | No    | No    | No     | Yes    | Yes    |
| <i>p-value</i>                 | 0.099 | 0.099 | 0.099 | 0.099 | 0.154  | <0.001 | <0.009 |
| Diclofenac                     | Yes   | Yes   | No    | Yes   | Yes    | No     | Yes    |
| <i>p-value</i>                 | 0.016 | 0.006 | 0.649 | 0.006 | 0.009  | 0.971  | 0.012  |
| Fluoxetine                     | No    | No    | No    | No    | Yes    | Yes    | Yes    |
| <i>p-value</i>                 | 0.426 | 0.426 | 0.426 | 0.416 | 0.020  | <0.001 | 0.001  |
| Gemfibrozil                    | No    | No    | No    | No    | Yes    | Yes    | No     |
| <i>p-value</i>                 | 0.05  | 0.05  | 0.05  | 0.05  | <0.001 | <0.001 | 0.685  |
| Ibuprofen                      | No    | No    | No    | No    | Yes    | Yes    | No     |
| <i>p-value</i>                 | 0.113 | 0.113 | 0.113 | 0.113 | 0.004  | 0.011  | 0.840  |
| Lincomycin                     | No    | No    | No    | No    | No     | Yes    | Yes    |
| <i>p-value</i>                 | 0.506 | 0.506 | 0.506 | 0.554 | 0.154  | <0.001 | 0.002  |
| Monensin                       | Yes   | Yes   | No    | No    | Yes    | Yes    | No     |
| <i>p-value</i>                 | 0.019 | 0.011 | 0.790 | 0.230 | 0.003  | 0.002  | 0.769  |
| Naproxen                       | No    | No    | No    | No    | Yes    | Yes    | Yes    |
| <i>p-value</i>                 | 0.255 | 0.255 | 0.255 | 0.565 | <0.001 | <0.001 | 0.010  |
| Norfluoxetine                  | No    | No    | No    | No    | No     | Yes    | No     |

|                  |       |       |       |       |       |       |       |
|------------------|-------|-------|-------|-------|-------|-------|-------|
| <i>p-value</i>   | 0.417 | 0.417 | 0.417 | 0.417 | 0.403 | 0.03  | 0.153 |
| Sulfamethazine   | No    | No    | No    | Yes   | No    | Yes   | Yes   |
| <i>p-value</i>   | 0.283 | 0.283 | 0.283 | 0.033 | 0.163 | 0.003 | 0.023 |
| Sulfamethoxazole | No    | No    | No    | No    | Yes   | Yes   | No    |
| <i>p-value</i>   | 0.712 | 0.712 | 0.712 | 0.122 | 0.022 | 0.008 | 0.548 |
| Triclosan        | No    | No    | No    | No    | No    | yes   | No    |
| <i>p-value</i>   | 0.330 | 0.330 | 0.330 | 0.330 | 0.159 | 0.037 | 0.445 |
| Trimethoprim     | No    | No    | No    | No    | No    | Yes   | No    |
| <i>p-value</i>   | 0.762 | 0.762 | 0.762 | 0.762 | 0.236 | 0.027 | 0.225 |
| Venlafaxine      | No    | No    | No    | No    | No    | Yes   | No    |
| <i>p-value</i>   | 0.578 | 0.578 | 0.578 | 0.578 | 0.075 | 0.009 | 0.204 |

**Table S4.** PPCPs types and number of bonds

| PPCPs  | #rings | aromatic ring | #OH (Hydroxy) | H bond acceptor | H bond donor | Carboxyl (COOH) | Anisole (OCH <sub>3</sub> ) | Methyl (CH <sub>3</sub> ) | Amide (NHCO) |
|--------|--------|---------------|---------------|-----------------|--------------|-----------------|-----------------------------|---------------------------|--------------|
| BPA    | 2      | 2             | 2             | 2               | 2            |                 |                             | 2                         |              |
| NPX    | 2      | 2             | -             | 3               | 1            | 1               | 1                           | 1                         |              |
| ATOR   | 4      | 4             | 3             | 5               | 4            | 1               |                             | 2                         | 1            |
| pATOR  | 4      | 4             | 3             | 5               | 4            | 1               |                             | 2                         | 1            |
| oATOR  | 4      | 4             | 3             | 6               | 5            | 1               |                             | 2                         | 1            |
| SULF   | 2      | 2             |               | 4               | 2            |                 | 1                           | 1                         | 0            |
| TCS    | 2      | 2             | 1             | 1               | 1            |                 |                             |                           |              |
| SMZ    | 2      | 2             |               | 5               | 2            |                 |                             | 2                         | 0            |
| IBU    | 1      | 1             |               | 2               | 1            | 1               |                             | 3                         |              |
| LIN    | 2      | 0             | 4             | 7               | 5            |                 |                             | 4                         |              |
| GFZ    | 1      | 1             |               | 3               | 1            | 1               |                             | 4                         | 1            |
| MON    | 5      | 0             | 3             | 11              | 4            | 1               |                             | 8                         |              |
| desVEn | 2      | 1             | 2             | 3               | 2            |                 |                             | 2                         |              |
| ACE    | 1      | 1             | 2             | 3               | 2            |                 |                             | 1                         |              |
| CBZ    | 3      | 2             |               |                 |              |                 |                             |                           |              |
| eBCZ   | 3      | 4             | 2             | 2               | 1            |                 |                             |                           |              |
| VEN    | 2      | 1             | 1             | 3               | 1            |                 | 1                           | 2                         |              |
| CAFF   | 2      | 2             |               | 3               |              |                 |                             | 3                         |              |
| TRIM   | 2      | 2             |               | 7               | 2            |                 | 3                           | 3                         |              |
| NFLX   | 3      | 2             |               | 6               | 2            | 1               |                             | 1                         |              |
| ATEN   | 1      | 1             | 1             | 4               | 3            |                 |                             | 2                         |              |
| FLX    | 2      | 2             |               | 2               | 1            |                 |                             | 1                         |              |

|      |   |   |  |   |   |   |  |   |   |
|------|---|---|--|---|---|---|--|---|---|
| ATRZ | 1 | 1 |  | 5 | 2 |   |  | 3 |   |
| DCF  | 2 | 2 |  | 3 | 2 | 1 |  |   | 1 |

, The PCA analysis couldn't provide required scores due to the lack of data points

**Table S5.** Correlation coefficient in PCA matrix

| Variables                 | UPW   | SSW   | WWE   |
|---------------------------|-------|-------|-------|
| <b>Charge</b>             | -0.45 | -0.33 | -0.26 |
| <b>Log D<sub>ow</sub></b> | 0.53  | 0.40  | 0.45  |
| <b>Solubility</b>         | -0.53 | -0.50 | -0.57 |
| <b>Weight</b>             | 0.34  | 0.65  | 0.58  |

\*Correlation matrix calculated using principle component analysis function (multivariate analysis), OriginPro 8.

**Table S6.** Extracted Eigenvectors in three water matrices

|                           | UPW          |           | SSW         |             | WWE          |              |
|---------------------------|--------------|-----------|-------------|-------------|--------------|--------------|
|                           | PC1 (60.36%) | PC2 (16%) | PC1 (49.7%) | PC2 (26.7%) | PC1 (58.09%) | PC2 (18.05%) |
| <b>Charge</b>             | -0.41        | 0.51      | -0.14       | 0.68        | -0.37        | 0.68         |
| <b>Log D<sub>ow</sub></b> | 0.52         | -0.20     | 0.49        | 0.40        | 0.47         | -0.14        |
| <b>Solubility</b>         | -0.51        | -0.15     | -0.53       | -0.42       | -0.51        | -0.05        |
| <b>Weight</b>             | 0.35         | 0.81      | 0.46        | -0.32       | 0.37         | 0.72         |

**Table S7.** Total organic carbon for **wastewater effluent** upon collection from the Waterloo treatment plant and after photocatalytic tests were performed on the matrix.

| Inorganics | Units | Waterloo Treatment Plant | 120 min dark treatment | 120 min photolysis | 120 min photocatalysis |
|------------|-------|--------------------------|------------------------|--------------------|------------------------|
|------------|-------|--------------------------|------------------------|--------------------|------------------------|



|                            |                    |      |      |      |      |
|----------------------------|--------------------|------|------|------|------|
| Total Organic Carbon (TOC) | mg L <sup>-1</sup> | 9.37 | 8.70 | 8.20 | 6.90 |
|----------------------------|--------------------|------|------|------|------|

**Table S8.** *p*-values for One-Way ANOVA tests (SigmaPlot,  $\alpha=0.05$ ) for EEO. Tukey tests (multiple comparisons) were conducted when a statistical significance was detected with overall statistical significance level of 0.05.

| Compound               | UPW vs. SSW | UPW vs. WWE | SSW vs. WWE |
|------------------------|-------------|-------------|-------------|
| Acetaminophen          | No          | Yes         | Yes         |
| <i>p</i> -value        | 0.988       | 0.023       | 0.014       |
| Atenolol               | No          | Yes         | Yes         |
| <i>p</i> -value        | 0.877       | <0.001      | <0.001      |
| Atorvastatin           | Yes         | Yes         | Yes         |
| <i>p</i> -value        | 0.002       | 0.019       | <0.001      |
| o-Hydroxy Atorvastatin | No          | Yes         | Yes         |
| <i>p</i> -value        | 0.989       | <0.001      | <0.001      |
| p-Hydroxy Atorvastatin | No          | Yes         | Yes         |
| <i>p</i> -value        | 0.809       | <0.001      | <0.001      |
| Atrazine               | No          | Yes         | Yes         |
| <i>p</i> -value        | 0.578       | <0.001      | <0.001      |
| Bisphenol A            | Yes         | Yes         | Yes         |
| <i>p</i> -value        | 0.025       | <0.001      | <0.001      |
| Caffeine               | No          | Yes         | Yes         |
| <i>p</i> -value        | 0.594       | <0.001      | <0.001      |
| Carbamazepine          | No          | Yes         | Yes         |
| <i>p</i> -value        | 0.995       | <0.001      | <0.001      |

|                           |       |        |        |
|---------------------------|-------|--------|--------|
| 10,11-Epoxy Carbamazepine | No    | Yes    | Yes    |
| <i>p</i> -value           | 0.611 | <0.001 | <0.001 |
| Desvenlafaxine            | No    | Yes    | Yes    |
| <i>p</i> -value           | 0.343 | 0.004  | <0.001 |
| Diclofenac                | No    | No     | No     |
| <i>p</i> -value           | 0.967 | 0.967  | 0.967  |
| Fluoxetine                | No    | Yes    | Yes    |
| <i>p</i> -value           | 0.845 | <0.001 | <0.001 |
| Gemfibrozil               | No    | Yes    | Yes    |
| <i>p</i> -value           | 0.163 | <0.001 | <0.001 |
| Ibuprofen                 | No    | Yes    | Yes    |
| <i>p</i> -value           | 0.148 | 0.001  | <0.001 |
| Lincomycin                | No    | Yes    | Yes    |
| <i>p</i> -value           | 0.393 | 0.001  | <0.001 |
| Monensin                  | No    | Yes    | Yes    |
| <i>p</i> -value           | 0.345 | 0.007  | 0.002  |
| Naproxen                  | Yes   | Yes    | Yes    |
| <i>p</i> -value           | 0.026 | <0.001 | <0.001 |
| Norfluoxetine             | No    | Yes    | Yes    |
| <i>p</i> -value           | 0.689 | <0.001 | <0.001 |
| Sulfamethazine            | No    | Yes    | Yes    |
| <i>p</i> -value           | 0.831 | <0.001 | <0.001 |
| Sulfamethoxazole          | Yes   | Yes    | Yes    |
| <i>p</i> -value           | 0.011 | <0.001 | <0.001 |
| Triclosan                 | No    | Yes    | Yes    |

|                 |       |        |        |
|-----------------|-------|--------|--------|
| <i>p</i> -value | 0.261 | <0.001 | <0.001 |
| Trimethoprim    | No    | Yes    | Yes    |
| <i>p</i> -value | 1     | <0.001 | <0.001 |
| Venlafaxine     | No    | Yes    | Yes    |
| <i>p</i> -value | 0.903 | <0.001 | <0.001 |

**Table S9.** Chemical and physical properties of targeted PPCPs in three water matrices and their concentrations UPW = ultrapure water; SSW = synthetic surface water; WWE = wastewater effluent

|        | UPW                 |                   |                    |                    | SSW    |       |       |       | WWE    |        |        |       |        |
|--------|---------------------|-------------------|--------------------|--------------------|--------|-------|-------|-------|--------|--------|--------|-------|--------|
|        | charge <sup>a</sup> | logD <sup>b</sup> | log S <sup>c</sup> | Conc. <sup>d</sup> | Charge | LogD  | Log S | Conc. | Charge | LogD   | log S  | Conc. | MW     |
| ACE    | 0                   | 0.91              | -1.132             | 1.6                | -0.03  | 0.89  | -1.12 | 1.96  | 0      | 0.906  | -1.131 | 0.04  | 151.16 |
| ATEN   | 1                   | -2.678            | 0.428              | 2                  | 0.98   | -1.24 | 0.1   | 1.96  | 1      | -2.14  | 0.428  | 0.01  | 266.34 |
| ATOR   | -0.98               | 3.7               | -5.34              | 1.92               | -1     | 2.09  | -3.36 | 1.72  | -1     | 2.76   | -4.36  | 0.05  | 558.64 |
| pATOR  | 0                   | 5.75              | -7.37              | 1.03               | -0.04  | 5.75  | -7.37 | 1.92  | 0      | 5.75   | -7.37  | 0.09  | 556.63 |
| oATOR  | -0.98               | 3.3912            | -4.86              | 1.32               | -1.15  | 1.71  | -2.8  | 1.8   | -1.01  | 2.44   | -3.86  | 0.1   | 574.65 |
| ATRZ   | 0                   | 2.19              | -3.79              | 2.18               | 0      | 2.2   | -3.8  | 2.08  | 0      | 2.19   | -3.8   | 0     | 214.68 |
| BPA    | 0                   | 4.04              | -3.18              | 1.69               | -0.02  | 4.04  | -3.18 | 2.85  | 0      | 4.04   | -3.18  | 0.03  | 228.29 |
| CAFF   | -0.02               | -0.55             | -0.44              | 2.8                | -0.68  | -0.55 | -0.44 | 2.44  | -0.17  | -0.55  | -0.44  | 0.01  | 194.19 |
| CBZ    | 0                   | 2.77              | -3.79              | 2.52               | 0      | 2.77  | -3.79 | 2.4   | 0      | 2.77   | -3.79  | 0.02  | 236.27 |
| eBCZ   | 0.08                | 1.97              | -3.33              | 2.69               | 0      | 1.97  | -3.33 | 2.52  | 0.01   | 1.97   | -3.33  | 0.01  | 236.27 |
| desVEn | 1                   | -0.22             | 0                  | 1.08               | 0.87   | 1.63  | -1.24 | 1.64  | 0.98   | 0.687  | -0.286 | 0.03  | 263.37 |
| DCF    | -0.99               | 2.263             | -2.289             | 1.69               | -1     | 0.855 | -0.29 | 3.04  | -1     | 1.368  | -1.293 | 0.03  | 296.15 |
| FLX    | 1                   | 1.037             | -2.703             | 1.69               | 0.98   | 2.38  | -2.26 | 2.16  | 1      | 1.5042 | -1.269 | 0.01  | 309.33 |
| GFZ    | -0.97               | 2.8               | -1.716             | 1.87               | -1     | 1.14  | 0     | 2     | -1     | 1.852  | -0.726 | 0.01  | 250.33 |
| IBU    | -0.93               | 2.67              | -2.36              | 2.19               | -1     | 0.85  | -0.39 | 1.96  | -0.99  | 1.71   | -1.39  | 0.01  | 206.28 |
| LIN    | 1                   | -2.27             | -0.412             | 2.85               | 0.48   | -0.6  | -2.1  | 2.88  | 0.9    | -1.33  | -1.372 | 0.05  | 406.5  |
| MON    | -1                  | 3.052             | -3.302             | 1.73               | -1     | 1.49  | -1.31 | 2.24  | -0.99  | 2.12   | -2.31  | 0.02  | 670.9  |
| NPX    | -0.98               | 1.17              | -1.63              | 1.93               | -1     | -0.36 | 0     | 1.88  | -1     | 0.251  | -0.637 | 0.04  | 230.6  |

|             |        |         |        |      |       |       |       |      |       |        |        |      |        |
|-------------|--------|---------|--------|------|-------|-------|-------|------|-------|--------|--------|------|--------|
| <b>NFLX</b> | 1      | -1.07   | -1.945 | 2.24 | 0.98  | -1.01 | -2.02 | 2.72 | 1     | -0.971 | -2.064 | 0.01 | 319.33 |
| <b>SMZ</b>  | -0.092 | 0.613   | -2.78  | 2.24 | -0.91 | -0.06 | -1.77 | 2.2  | -0.5  | 0.39   | -2.51  | 0.04 | 278.33 |
| <b>SULF</b> | -0.41  | 0.596   | -1.97  | 1.82 | -0.99 | -0.11 | -0.36 | 1.72 | -0.87 | 0.145  | -1.3   | 0.03 | 253.28 |
| <b>TCS</b>  | -0.02  | 4.97    | -5.27  | 2.32 | -0.68 | 4.5   | -4.79 | 2.6  | -0.17 | 4.9    | -5.193 | 0.05 | 289.54 |
| <b>TRIM</b> | 0.93   | 0.269   | -1.616 | 1.96 | 0.12  | 1.23  | -2.74 | 2.08 | 0.59  | 0.918  | -2.415 | 0.01 | 290.32 |
| <b>VEN</b>  | 1      | -0.0713 | 0      | 1.61 | 0.89  | 1.78  | -1.62 | 1.88 | 0.99  | 0.836  | -0.668 | 0.01 | 277.4  |

<sup>a</sup> Net charge off PPCPs in ultrapure water (UPW), synthetic surface water (SSW) and wastewater effluents (WWE) taken from <http://Chemicalize.org> based on their pH (UPW: pH= 6, WWE: pH=7, SSW: pH=8)

<sup>b</sup> Dow=pH corrected for Kow, taken from <https://pubchem.ncbi.nlm.nih.gov/>, <http://Chemicalize.org>

<sup>c</sup> Solubility, taken from <https://pubchem.ncbi.nlm.nih.gov/>, <http://Chemicalize.org>

<sup>d</sup> The nominal concentration for all target compounds were 2 µg L<sup>-1</sup>. The values reported here are the measured concentrations by LC-MS/MS and has considered uncertainties in the experiments and analytical work

UPW: ultrapure water; SSW: Synthetic river water; WWE: wastewater effluents

**Table S10.** List of PPCPs, isotopically labeled standard and suppliers

| Pharmaceutical                    | Supplier         | Pharmaceutical     | Supplier           |
|-----------------------------------|------------------|--------------------|--------------------|
|                                   | r                |                    | r                  |
| Acetaminophen                     | Sigma            | Gemfibrozil        | Sigma              |
| d- Acetaminophen                  | CDN              | d- Gemfibrozil     | CDN                |
| Atenolol                          | Sigma            | Ibuprofen          | Sigma              |
| d-Atenolol                        | CDN              | d- Ibuprofen       | CDN                |
| Atrazine                          | Sigma            | Lincomycin         | Sigma              |
| d- Atrazine                       | CDN              | d-Lincomycin       | TRC                |
| Atorvastatin                      | TRC <sup>1</sup> | Naproxen           | Sigma              |
| d-Atorvastatin                    | TRC              | d- Naproxen        | CDN                |
| d-hydroxy Atorvastatin (o- or 2-) | TRC              | Norfluoxetine      | Sigma              |
| d-hydroxy Atorvastatin (p- or 4-) | TRC              | d-Norfluoxetine    | CDN                |
| hydroxy Atorvastatin (o- or 2-)   | TRC              | Monensin           | Sigma              |
| hydroxy Atorvastatin (p- or 4-)   | TRC              | Sulfamethoxazole   | Sigma              |
| Carbamazepine                     | Sigma            | d-Sulfamethoxazole | TRC                |
| d- Carbamazepine                  | CDN              | Sulfamethazine     | Sigma <sup>2</sup> |
| 10,11epoxide- Carbamazepine       | Sigma            | d-Sulfamethazine   | TRC                |
| d-10,11epoxide- Carbamazepine     | CDN              | Triclosan          | Sigma              |
| Caffeine                          | CDN              | d-Triclosan        | CDN <sup>3</sup>   |
| d-Caffeine                        | Sigma            | Trimethoprim       | Sigma              |
| Diclofenac                        | Sigma            | d- Trimethoprim    | CDN                |
| d-Diclofenac                      | CDN              | Venlafaxine        | Sigma              |
| Fluoxetine                        | Sigma            | d- Venlafaxine     | CDN                |
| d- Fluoxetine                     | CDN              |                    |                    |

<sup>1</sup> Toronto Research Chemicals <https://www.trc-canada.com/><sup>2</sup> Sigma-Aldrich Inc. <https://www.sigmaaldrich.com/canada-english.html><sup>3</sup> CDN Isotopes [https://cdnisotopes.com/ca/?\\_\\_store=ca\\_view](https://cdnisotopes.com/ca/?__store=ca_view)

## References

1. Mouchtari, E. M. El; CDaou, C.; Rafqah, S.; Najjar, F.; Anane, H.; Piram, A.; Hamade, A.; Briche, S.; Wong-Wah-Chung, P. TiO<sub>2</sub> and Activated Carbon of Argania Spinosa Tree Nutshells Composites for the Adsorption Photocatalysis Removal of Pharmaceuticals from Aqueous Solution. *J. Photochem. Photobiol. A Chem.* **2020**, 388, 112183.
2. Díaz-Rodríguez, D.; Palacios-Antón, M. E.; Santana, R. M. D. R.; Quiroz-Fernández, L. S.; Gómez-Salcedo, Y.; de Lucena, A. L. A.; Napoleão, D. C.; Rodriguez-Diaz, J. M. Comparative Study of the Degradation of the Diclofenac Drug Using Photo-Peroxidation and Heterogeneous Photocatalysis with UV-C and Solar Radiation. *Water, Air, Soil Pollut.* **2020**, 231 (4), 1–12.
3. Altamirano Briones, A.; Córdor Guevara, I.; Mena, D.; Espinoza, I.; Sandoval-Pauker, C.; Ramos Guerrero, L.; Vargas Jentsch, P.; Muñoz Bisesti, F. Degradation of Meropenem by Heterogeneous Photocatalysis Using TiO<sub>2</sub>/Fiberglass Substrates. *Catalysts* **2020**, 10 (3), 344.
4. Monteagudo, J. M.; Durán, A.; Martínez, M. R.; San Martín, I. Effect of Reduced Graphene Oxide Load into TiO<sub>2</sub> P25 on the Generation of Reactive Oxygen Species in a Solar Photocatalytic Reactor. Application to Antipyrine Degradation. *Chem. Eng. J.* **2020**, 380, 122410.
5. Peñas-Garzón, M.; Gómez-Avilés, A.; Belver, C.; Rodriguez, J. J.; Bedia, J. Degradation Pathways of Emerging Contaminants Using TiO<sub>2</sub>-Activated Carbon Heterostructures in Aqueous Solution under Simulated Solar Light. *Chem. Eng. J.* **2020**, 124867.
6. Valério, A.; Wang, J.; Tong, S.; de Souza, A. A. U.; Hotza, D.; González, S. Y. G. Synergetic Effect of Photocatalysis and Ozonation for Enhanced Tetracycline Degradation Using Highly Macroporous Photocatalytic Supports. *Chem. Eng. Process. Intensif.* **2020**, 149, 107838.
7. Liang, R.; Van Leuwen, J. C.; Bragg, L. M.; Arlos, M. J.; Fong, L. C. M. L. C.; Schneider, O. M.; Jaciw-Zurakowsky, I.; Fattahi, A.; Rathod, S.; Peng, P. Utilizing UV-LED Pulse Width Modulation on TiO<sub>2</sub> Advanced Oxidation Processes to Enhance the Decomposition Efficiency of Pharmaceutical Micropollutants. *Chem. Eng. J.* **2019**, 361, 439–449.
8. Yi, C.; Liao, Q.; Deng, W.; Huang, Y.; Mao, J.; Zhang, B.; Wu, G. The Preparation of Amorphous TiO<sub>2</sub> Doped with Cationic S and Its Application to the Degradation of DCFs

- under Visible Light Irradiation. *Sci. Total Environ.* **2019**, *684*, 527–536.
9. Hinojosa-Reyes, M.; Camposeco-Solis, R.; Ruiz, F.; Rodríguez-González, V.; Moctezuma, E. Promotional Effect of Metal Doping on Nanostructured TiO<sub>2</sub> during the Photocatalytic Degradation of 4-Chlorophenol and Naproxen Sodium as Pollutants. *Mater. Sci. Semicond. Process.* **2019**, *100*, 130–139.
  10. Uheida, A.; Mohamed, A.; Belqziz, M.; Nasser, W. S. Photocatalytic Degradation of Ibuprofen, Naproxen, and Cetirizine Using PAN-MWCNT Nanofibers Crosslinked TiO<sub>2</sub>-NH<sub>2</sub> Nanoparticles under Visible Light Irradiation. *Sep. Purif. Technol.* **2019**, *212*, 110–118.
  11. Shahzad, A.; Rasool, K.; Nawaz, M.; Miran, W.; Jang, J.; Moztahida, M.; Mahmoud, K. A.; Lee, D. S. Heterostructural TiO<sub>2</sub>/Ti<sub>3</sub>C<sub>2</sub>T<sub>x</sub> (MXene) for Photocatalytic Degradation of Antiepileptic Drug Carbamazepine. *Chem. Eng. J.* **2018**, *349*, 748–755.
  12. Namshah, K. S.; Mohamed, R. M. WO<sub>3</sub>-TiO<sub>2</sub> Nanocomposites for Paracetamol Degradation under Visible Light. *Appl. Nanosci.* **2018**, *8* (8), 2021–2030.
  13. Shinde, Y.; Wadhai, S.; Ponkshe, A.; Kapoor, S.; Thakur, P. Decoration of Pt on the Metal Free RGO-TiO<sub>2</sub> Composite Photocatalyst for the Enhanced Photocatalytic Hydrogen Evolution and Photocatalytic Degradation of Pharmaceutical Pollutant  $\beta$  Blocker. *Int. J. Hydrogen Energy* **2018**, *43* (8), 4015–4027.
  14. Abdel-Maksoud, Y. K.; Imam, E.; Ramadan, A. R. Sand Supported TiO<sub>2</sub> Photocatalyst in a Tray Photo-Reactor for the Removal of Emerging Contaminants in Wastewater. *Catal. Today* **2018**, *313*, 55–62.
  15. Czech, B.; Tyszczyk-Rotko, K. Visible-Light-Driven Photocatalytic Removal of Acetaminophen from Water Using a Novel MWCNT-TiO<sub>2</sub>-SiO<sub>2</sub> Photocatalysts. *Sep. Purif. Technol.* **2018**, *206*, 343–355.
  16. Blanco-Vega, M. P.; Guzmán-Mar, J. L.; Villanueva-Rodríguez, M.; Maya-Treviño, L.; Garza-Tovar, L. L.; Hernández-Ramírez, A.; Hinojosa-Reyes, L. Photocatalytic Elimination of Bisphenol A under Visible Light Using Ni-Doped TiO<sub>2</sub> Synthesized by Microwave Assisted Sol-Gel Method. *Mater. Sci. Semicond. Process.* **2017**, *71*, 275–282.
  17. Abdelhaleem, A.; Chu, W. Photodegradation of 4-Chlorophenoxyacetic Acid under Visible LED Activated N-Doped TiO<sub>2</sub> and the Mechanism of Stepwise Rate Increment of the Reused Catalyst. *J. Hazard. Mater.* **2017**, *338*, 491–501.



- <https://doi.org/https://doi.org/10.1016/j.jhazmat.2017.05.056>.
18. Lin, L.; Wang, H.; Xu, P. Immobilized TiO<sub>2</sub>-Reduced Graphene Oxide Nanocomposites on Optical Fibers as High Performance Photocatalysts for Degradation of Pharmaceuticals. *Chem. Eng. J.* **2017**, *310*, 389–398.
  19. Bilgin Simsek, E. Solvothermal Synthesized Boron Doped TiO<sub>2</sub> Catalysts: Photocatalytic Degradation of Endocrine Disrupting Compounds and Pharmaceuticals under Visible Light Irradiation. *Appl. Catal. B Environ.* **2017**, *200*, 309–322.  
<https://doi.org/10.1016/j.apcatb.2016.07.016>.
  20. Arlos, M. J.; Liang, R.; Li Chun Fong, L. C. M.; Zhou, N. Y.; Ptacek, C. J.; Andrews, S. A.; Servos, M. R. Influence of Methanol When Used as a Water-Miscible Carrier of Pharmaceuticals in TiO<sub>2</sub> Photocatalytic Degradation Experiments. *J. Environ. Chem. Eng.* **2017**, *5* (5), 4497–4504. <https://doi.org/https://doi.org/10.1016/j.jece.2017.08.048>.
  21. Lin, L.; Wang, H.; Jiang, W.; Mkaouar, A. R.; Xu, P. Comparison Study on Photocatalytic Oxidation of Pharmaceuticals by TiO<sub>2</sub>-Fe and TiO<sub>2</sub>-Reduced Graphene Oxide Nanocomposites Immobilized on Optical Fibers. *J. Hazard. Mater.* **2017**, *333*, 162–168.  
<https://doi.org/https://doi.org/10.1016/j.jhazmat.2017.02.044>.
  22. Arlos, M. J.; Hatat-Fraile, M. M.; Liang, R.; Bragg, L. M.; Zhou, N. Y.; Andrews, S. A.; Servos, M. R. Photocatalytic Decomposition of Organic Micropollutants Using Immobilized TiO<sub>2</sub> Having Different Isoelectric Points. *Water Res.* **2016**, *101*, 351–361.
  23. Pazoki, M.; Parsa, M.; Farhadpour, R. Removal of the Hormones Dexamethasone (DXM) by Ag Doped on TiO<sub>2</sub> Photocatalysis. *J. Environ. Chem. Eng.* **2016**, *4* (4), 4426–4434.  
<https://doi.org/10.1016/j.jece.2016.09.034>.
  24. Bhatia, V.; Dhir, A. Transition Metal Doped TiO<sub>2</sub> Mediated Photocatalytic Degradation of Anti-Inflammatory Drug under Solar Irradiations. *J. Environ. Chem. Eng.* **2016**, *4* (1), 1267–1273. <https://doi.org/10.1016/j.jece.2016.01.032>.
  25. Kaur, T.; Sraw, A.; Toor, A. P.; Wanchoo, R. K. Utilization of Solar Energy for the Degradation of Carbendazim and Propiconazole by Fe Doped TiO<sub>2</sub>. *Sol. Energy* **2016**, *125*, 65–76. <https://doi.org/10.1016/j.solener.2015.12.001>.
  26. Eskandarian, M. R.; Choi, H.; Fazli, M.; Rasoulifard, M. H. Effect of UV-LED Wavelengths on Direct Photolytic and TiO<sub>2</sub> Photocatalytic Degradation of Emerging Contaminants in Water. *Chem. Eng. J.* **2016**, *300*, 414–422.

27. Li, G.; Nie, X.; Gao, Y.; An, T. Can Environmental Pharmaceuticals Be Photocatalytically Degraded and Completely Mineralized in Water Using G-C<sub>3</sub>N<sub>4</sub>/TiO<sub>2</sub> under Visible Light Irradiation?—Implications of Persistent Toxic Intermediates. *Appl. Catal. B Environ.* **2016**, *180*, 726–732.
28. Lin, W.; Zheng, H.; Zhang, P.; Xu, T. Pt Deposited TiO<sub>2</sub> Films with Exposed {001} Facets for Photocatalytic Degradation of a Pharmaceutical Pollutant. *Appl. Catal. A Gen.* **2016**, *521*, 75–82. <https://doi.org/https://doi.org/10.1016/j.apcata.2015.10.032>.
29. Gar Alalm, M.; Tawfik, A.; Ookawara, S. Enhancement of Photocatalytic Activity of TiO<sub>2</sub> by Immobilization on Activated Carbon for Degradation of Pharmaceuticals. *J. Environ. Chem. Eng.* **2016**, *4* (2), 1929–1937. <https://doi.org/https://doi.org/10.1016/j.jece.2016.03.023>.
30. Salma, A.; Thoröe-Boveleth, S.; Schmidt, T. C.; Tuerk, J. Dependence of Transformation Product Formation on PH during Photolytic and Photocatalytic Degradation of Ciprofloxacin. *J. Hazard. Mater.* **2016**, *313*, 49–59. <https://doi.org/https://doi.org/10.1016/j.jhazmat.2016.03.010>.
31. Czech, B.; Buda, W. Photocatalytic Treatment of Pharmaceutical Wastewater Using New Multiwall-Carbon Nanotubes/TiO<sub>2</sub>/SiO<sub>2</sub> Nanocomposites. *Environ. Res.* **2015**, *137*, 176–184. <https://doi.org/https://doi.org/10.1016/j.envres.2014.12.006>.
32. Vaiano, V.; Sacco, O.; Sannino, D.; Ciambelli, P. Photocatalytic Removal of Spiramycin from Wastewater under Visible Light with N-Doped TiO<sub>2</sub> Photocatalysts. *Chem. Eng. J.* **2015**, *261*, 3–8. <https://doi.org/https://doi.org/10.1016/j.cej.2014.02.071>.
33. Lai, W. W.-P.; Lin, H. H.-H.; Lin, A. Y.-C. TiO<sub>2</sub> Photocatalytic Degradation and Transformation of Oxazaphosphorine Drugs in an Aqueous Environment. *J. Hazard. Mater.* **2015**, *287*, 133–141. <https://doi.org/https://doi.org/10.1016/j.jhazmat.2015.01.045>.
34. Sarkar, S.; Chakraborty, S.; Bhattacharjee, C. Photocatalytic Degradation of Pharmaceutical Wastes by Alginate Supported TiO<sub>2</sub> Nanoparticles in Packed Bed Photo Reactor (PBPR). *Ecotoxicol. Environ. Saf.* **2015**, *121*, 263–270. <https://doi.org/https://doi.org/10.1016/j.ecoenv.2015.02.035>.
35. Zhang, X.; Zhou, J.; Gu, Y.; Fan, D. Visible-Light Photocatalytic Activity of N-Doped TiO<sub>2</sub> Nanotube Arrays on Acephate Degradation. *J. Nanomater.* **2015**, *2015*.
36. Lavand, A. B.; Malghe, Y. S. Nano Sized C-Doped TiO<sub>2</sub> as a Visible-Light Photocatalyst

- for the Degradation of 2, 4, 6-Trichlorophenol. *Adv. Mater. Lett* **2015**, 6 (8), 695–700.
37. Boxi, S. S.; Paria, S. Visible Light Induced Enhanced Photocatalytic Degradation of Organic Pollutants in Aqueous Media Using Ag Doped Hollow TiO<sub>2</sub> Nanospheres. *RSC Adv.* **2015**, 5 (47), 37657–37668.
  38. Sood, S.; Umar, A.; Mehta, S. K.; Kansal, S. K. Highly Effective Fe-Doped TiO<sub>2</sub> Nanoparticles Photocatalysts for Visible-Light Driven Photocatalytic Degradation of Toxic Organic Compounds. *J. Colloid Interface Sci.* **2015**, 450, 213–223.  
<https://doi.org/https://doi.org/10.1016/j.jcis.2015.03.018>.
  39. Kadam, A. N.; Dhabbe, R. S.; Kokate, M. R.; Gaikwad, Y. B.; Garadkar, K. M. Preparation of N Doped TiO<sub>2</sub> via Microwave-Assisted Method and Its Photocatalytic Activity for Degradation of Malathion. *Spectrochim. Acta Part A Mol. Biomol. Spectrosc.* **2014**, 133, 669–676. <https://doi.org/https://doi.org/10.1016/j.saa.2014.06.020>.
  40. Leong, K. H.; Gan, B. L.; Ibrahim, S.; Saravanan, P. Synthesis of Surface Plasmon Resonance (SPR) Triggered Ag/TiO<sub>2</sub> Photocatalyst for Degradation of Endocrine Disturbing Compounds. *Appl. Surf. Sci.* **2014**, 319, 128–135.  
<https://doi.org/https://doi.org/10.1016/j.apsusc.2014.06.153>.
  41. Kundu, P.; Kaur, A.; Mehta, S. K.; Kansal, S. K. Removal of Ofloxacin from Aqueous Phase Using Ni-Doped TiO<sub>2</sub> Nanoparticles under Solar Irradiation. *J. Nanosci. Nanotechnol.* **2014**, 14 (9), 6991–6995.
  42. Das, R.; Sarkar, S.; Chakraborty, S.; Choi, H.; Bhattacharjee, C. Remediation of Antiseptic Components in Wastewater by Photocatalysis Using TiO<sub>2</sub> Nanoparticles. *Ind. Eng. Chem. Res.* **2014**, 53 (8), 3012–3020.
  43. Ramasundaram, S.; Yoo, H. N.; Song, K. G.; Lee, J.; Choi, K. J.; Hong, S. W. Titanium Dioxide Nanofibers Integrated Stainless Steel Filter for Photocatalytic Degradation of Pharmaceutical Compounds. *J. Hazard. Mater.* **2013**, 258–259, 124–132.  
<https://doi.org/https://doi.org/10.1016/j.jhazmat.2013.04.047>.
  44. Nasuhoglu, D.; Rodayan, A.; Berk, D.; Yargeau, V. Removal of the Antibiotic Levofloxacin (LEVO) in Water by Ozonation and TiO<sub>2</sub> Photocatalysis. *Chem. Eng. J.* **2012**, 189–190, 41–48. <https://doi.org/https://doi.org/10.1016/j.cej.2012.02.016>.
  45. Shokri, M.; Jodat, A.; Modirshahla, N.; Behnajady, M. A. Photocatalytic Degradation of Chloramphenicol in an Aqueous Suspension of Silver-Doped TiO<sub>2</sub> Nanoparticles.

- Environ. Technol.* **2013**, *34* (9), 1161–1166.
46. Mohammadi, R.; Massoumi, B.; Rabani, M. Photocatalytic Decomposition of Amoxicillin Trihydrate Antibiotic in Aqueous Solutions under UV Irradiation Using Sn/TiO<sub>2</sub> Nanoparticles. *Int. J. Photoenergy* **2012**, *2012*.
  47. Tian, B.; Li, C.; Zhang, J. One-Step Preparation, Characterization and Visible-Light Photocatalytic Activity of Cr-Doped TiO<sub>2</sub> with Anatase and Rutile Bicrystalline Phases. *Chem. Eng. J.* **2012**, *191*, 402–409.  
<https://doi.org/https://doi.org/10.1016/j.cej.2012.03.038>.
  48. Hu, A.; Zhang, X.; Luong, D.; Oakes, K. D.; Servos, M. R.; Liang, R.; Kurdi, S.; Peng, P.; Zhou, Y. Adsorption and Photocatalytic Degradation Kinetics of Pharmaceuticals by TiO<sub>2</sub> Nanowires during Water Treatment. *Waste and Biomass Valorization* **2012**, *3* (4), 443–449.
  49. Hu, A.; Zhang, X.; Oakes, K. D.; Peng, P.; Zhou, Y. N.; Servos, M. R. Hydrothermal Growth of Free Standing TiO<sub>2</sub> Nanowire Membranes for Photocatalytic Degradation of Pharmaceuticals. *J. Hazard. Mater.* **2011**, *189* (1), 278–285.  
<https://doi.org/https://doi.org/10.1016/j.jhazmat.2011.02.033>.
  50. Gao, B.; Lim, T. M.; Subagio, D. P.; Lim, T.-T. Zr-Doped TiO<sub>2</sub> for Enhanced Photocatalytic Degradation of Bisphenol A. *Appl. Catal. A Gen.* **2010**, *375* (1), 107–115.  
<https://doi.org/https://doi.org/10.1016/j.apcata.2009.12.025>.
  51. Yang, H.; Li, G.; An, T.; Gao, Y.; Fu, J. Photocatalytic Degradation Kinetics and Mechanism of Environmental Pharmaceuticals in Aqueous Suspension of TiO<sub>2</sub>: A Case of Sulfa Drugs. *Catal. Today* **2010**, *153* (3), 200–207.  
<https://doi.org/https://doi.org/10.1016/j.cattod.2010.02.068>.
  52. Kovacic, M.; Papac, J.; Kusic, H.; Karamanis, P.; Loncaric Bozic, A. Degradation of Polar and Non-Polar Pharmaceutical Pollutants in Water by Solar Assisted Photocatalysis Using Hydrothermal TiO<sub>2</sub>-SnS<sub>2</sub>. *Chem. Eng. J.* **2020**, *382*, 122826.  
<https://doi.org/https://doi.org/10.1016/j.cej.2019.122826>.
  53. Pretali, L.; Maraschi, F.; Cantalupi, A.; Albini, A.; Sturini, M. Water Depollution and Photo-Detoxification by Means of TiO<sub>2</sub>: Fluoroquinolone Antibiotics as a Case Study. *Catalysts* **2020**, *10* (6), 1–23. <https://doi.org/10.3390/catal10060628>.
  54. Yuan, R.; Zhu, Y.; Zhou, B.; Hu, J. Photocatalytic Oxidation of Sulfamethoxazole in the

- Presence of TiO<sub>2</sub>: Effect of Matrix in Aqueous Solution on Decomposition Mechanisms. *Chem. Eng. J.* **2019**, *359*, 1527–1536.  
<https://doi.org/https://doi.org/10.1016/j.cej.2018.11.019>.
55. Awfa, D.; Ateia, M.; Fujii, M.; Yoshimura, C. Novel Magnetic Carbon Nanotube-TiO<sub>2</sub> Composites for Solar Light Photocatalytic Degradation of Pharmaceuticals in the Presence of Natural Organic Matter. *J. Water Process Eng.* **2019**, *31*, 100836.  
<https://doi.org/https://doi.org/10.1016/j.jwpe.2019.100836>.
  56. Murgolo, S.; Yargeau, V.; Gerbasi, R.; Visentin, F.; El Habra, N.; Ricco, G.; Lacchetti, I.; Carere, M.; Curri, M. L.; Mascolo, G. A New Supported TiO<sub>2</sub> Film Deposited on Stainless Steel for the Photocatalytic Degradation of Contaminants of Emerging Concern. *Chem. Eng. J.* **2017**, *318*, 103–111.  
<https://doi.org/https://doi.org/10.1016/j.cej.2016.05.125>.
  57. He, X.; Aker, W. G.; Pelaez, M.; Lin, Y.; Dionysiou, D. D.; Hwang, H. Assessment of Nitrogen–Fluorine-Codoped TiO<sub>2</sub> under Visible Light for Degradation of BPA: Implication for Field Remediation. *J. Photochem. Photobiol. A Chem.* **2016**, *314*, 81–92.  
<https://doi.org/https://doi.org/10.1016/j.jphotochem.2015.08.014>.
  58. Avisar, D.; Horovitz, I.; Lozzi, L.; Ruggieri, F.; Baker, M.; Abel, M.-L.; Mamane, H. Impact of Water Quality on Removal of Carbamazepine in Natural Waters by N-Doped TiO<sub>2</sub> Photo-Catalytic Thin Film Surfaces. *J. Hazard. Mater.* **2013**, *244–245*, 463–471.  
<https://doi.org/https://doi.org/10.1016/j.jhazmat.2012.09.058>.
  59. Fattahi, A.; Arlos, M. J.; Bragg, L. M.; Kowalczyk, S.; Liang, R.; Schneider, O. M.; Zhou, N.; Servos, M. R. Photodecomposition of Pharmaceuticals and Personal Care Products Using P25 Modified with Ag Nanoparticles in the Presence of Natural Organic Matter. *Sci. Total Environ.* **2020**, *752*, 142000.
  60. Paniagua, C. E. S.; Marson, E. O.; Ricardo, I. A.; Paiva, V. A. B.; Gonçalves, B. R.; Trovó, A. G. Matrix Effects on the Degradation of Gemfibrozil, Hydrochlorothiazide, and Naproxen by Heterogeneous Photocatalysis. *J. Braz. Chem. Soc.* **2020**, *31* (6), 1161–1169.
  61. Maniakova, G.; Kowalska, K.; Murgolo, S.; Mascolo, G.; Libralato, G.; Lofrano, G.; Sacco, O.; Guida, M.; Rizzo, L. Comparison between Heterogeneous and Homogeneous Solar Driven Advanced Oxidation Processes for Urban Wastewater Treatment: Pharmaceuticals Removal and Toxicity. *Sep. Purif. Technol.* **2020**, *236*, 116249.

62. Lumbaque, E. C.; Sirtori, C.; Vilar, V. J. P. Heterogeneous Photocatalytic Degradation of Pharmaceuticals in Synthetic and Real Matrices Using a Tube-in-Tube Membrane Reactor with Radial Addition of H<sub>2</sub>O<sub>2</sub>. *Sci. Total Environ.* **2020**, 140629.
63. Paredes, L.; Murgolo, S.; Dzinun, H.; Othman, M. H. D.; Ismail, A. F.; Carballa, M.; Mascolo, G. Application of Immobilized TiO<sub>2</sub> on PVDF Dual Layer Hollow Fibre Membrane to Improve the Photocatalytic Removal of Pharmaceuticals in Different Water Matrices. *Appl. Catal. B Environ.* **2019**, 240, 9–18.
64. Jallouli, N.; Pastrana-Martínez, L. M.; Ribeiro, A. R.; Moreira, N. F. F.; Faria, J. L.; Hentati, O.; Silva, A. M. T.; Ksibi, M. Heterogeneous Photocatalytic Degradation of Ibuprofen in Ultrapure Water, Municipal and Pharmaceutical Industry Wastewaters Using a TiO<sub>2</sub>/UV-LED System. *Chem. Eng. J.* **2018**, 334, 976–984.
65. Almomani, F.; Bhosale, R.; Kumar, A.; Khraisheh, M. Potential Use of Solar Photocatalytic Oxidation in Removing Emerging Pharmaceuticals from Wastewater: A Pilot Plant Study. *Sol. Energy* **2018**, 172, 128–140.
66. Malakootian, M.; Olama, N.; Nasiri, A. Photocatalytic Degradation of Metronidazole from Aquatic Solution by TiO<sub>2</sub>-Doped Fe<sup>3+</sup> Nano-Photocatalyst. *Int. J. Environ. Sci. Technol.* **2019**, 16 (8), 4275–4284.
67. Ahmadi, M.; Motlagh, H. R.; Jaafarzadeh, N.; Mostoufi, A.; Saeedi, R.; Barzegar, G.; Jorfi, S. Enhanced Photocatalytic Degradation of Tetracycline and Real Pharmaceutical Wastewater Using MWCNT/TiO<sub>2</sub> Nano-Composite. *J. Environ. Manage.* **2017**, 186, 55–63.
68. Gimeno, O.; García-Araya, J. F.; Beltrán, F. J.; Rivas, F. J.; Espejo, A. Removal of Emerging Contaminants from a Primary Effluent of Municipal Wastewater by Means of Sequential Biological Degradation-Solar Photocatalytic Oxidation Processes. *Chem. Eng. J.* **2016**, 290, 12–20.
69. He, Y.; Sutton, N. B.; Rijnaarts, H. H. H.; Langenhoff, A. A. M. Degradation of Pharmaceuticals in Wastewater Using Immobilized TiO<sub>2</sub> Photocatalysis under Simulated Solar Irradiation. *Appl. Catal. B Environ.* **2016**, 182, 132–141.
70. Maeng, S. K.; Cho, K.; Jeong, B.; Lee, J.; Lee, Y.; Lee, C.; Choi, K. J.; Hong, S. W. Substrate-Immobilized Electrospun TiO<sub>2</sub> Nanofibers for Photocatalytic Degradation of Pharmaceuticals: The Effects of PH and Dissolved Organic Matter Characteristics. *Water*

- Res.* **2015**, *86*, 25–34.
71. Márquez, G.; Rodríguez, E. M.; Maldonado, M. I.; Álvarez, P. M. Integration of Ozone and Solar TiO<sub>2</sub>-Photocatalytic Oxidation for the Degradation of Selected Pharmaceutical Compounds in Water and Wastewater. *Sep. Purif. Technol.* **2014**, *136*, 18–26.
  72. Ahmed, M. M.; Brienza, M.; Goetz, V.; Chiron, S. Solar Photo-Fenton Using Peroxymonosulfate for Organic Micropollutants Removal from Domestic Wastewater: Comparison with Heterogeneous TiO<sub>2</sub> Photocatalysis. *Chemosphere* **2014**, *117*, 256–261.
  73. Sousa, M. A.; Gonçalves, C.; Vilar, V. J. P.; Boaventura, R. A. R.; Alpendurada, M. F. Suspended TiO<sub>2</sub>-Assisted Photocatalytic Degradation of Emerging Contaminants in a Municipal WWTP Effluent Using a Solar Pilot Plant with CPCs. *Chem. Eng. J.* **2012**, *198*, 301–309.
  74. Zhang, W.; Li, Y.; Su, Y.; Mao, K.; Wang, Q. Effect of Water Composition on TiO<sub>2</sub> Photocatalytic Removal of Endocrine Disrupting Compounds (EDCs) and Estrogenic Activity from Secondary Effluent. *J. Hazard. Mater.* **2012**, *215*, 252–258.
  75. Prieto-Rodríguez, L.; Miralles-Cuevas, S.; Oller, I.; Agüera, A.; Puma, G. L.; Malato, S. Treatment of Emerging Contaminants in Wastewater Treatment Plants (WWTP) Effluents by Solar Photocatalysis Using Low TiO<sub>2</sub> Concentrations. *J. Hazard. Mater.* **2012**, *211*, 131–137.
  76. Bernabeu, A.; Vercher, R. F.; Santos-Juanes, L.; Simón, P. J.; Lardín, C.; Martínez, M. A.; Vicente, J. A.; González, R.; Llosá, C.; Arques, A. Solar Photocatalysis as a Tertiary Treatment to Remove Emerging Pollutants from Wastewater Treatment Plant Effluents. *Catal. Today* **2011**, *161* (1), 235–240.
  77. Laera, G.; Chong, M. N.; Jin, B.; Lopez, A. An Integrated MBR–TiO<sub>2</sub> Photocatalysis Process for the Removal of Carbamazepine from Simulated Pharmaceutical Industrial Effluent. *Bioresour. Technol.* **2011**, *102* (13), 7012–7015.
  78. Ioannou, L. A.; Hapeshi, E.; Vasquez, M. I.; Mantzavinos, D.; Fatta-Kassinos, D. Solar/TiO<sub>2</sub> Photocatalytic Decomposition of  $\beta$ -Blockers Atenolol and Propranolol in Water and Wastewater. *Sol. Energy* **2011**, *85* (9), 1915–1926.
